# Supplementary material
Source: PubMed Central journal article supplement (PMC4193361)

**Figure S1**

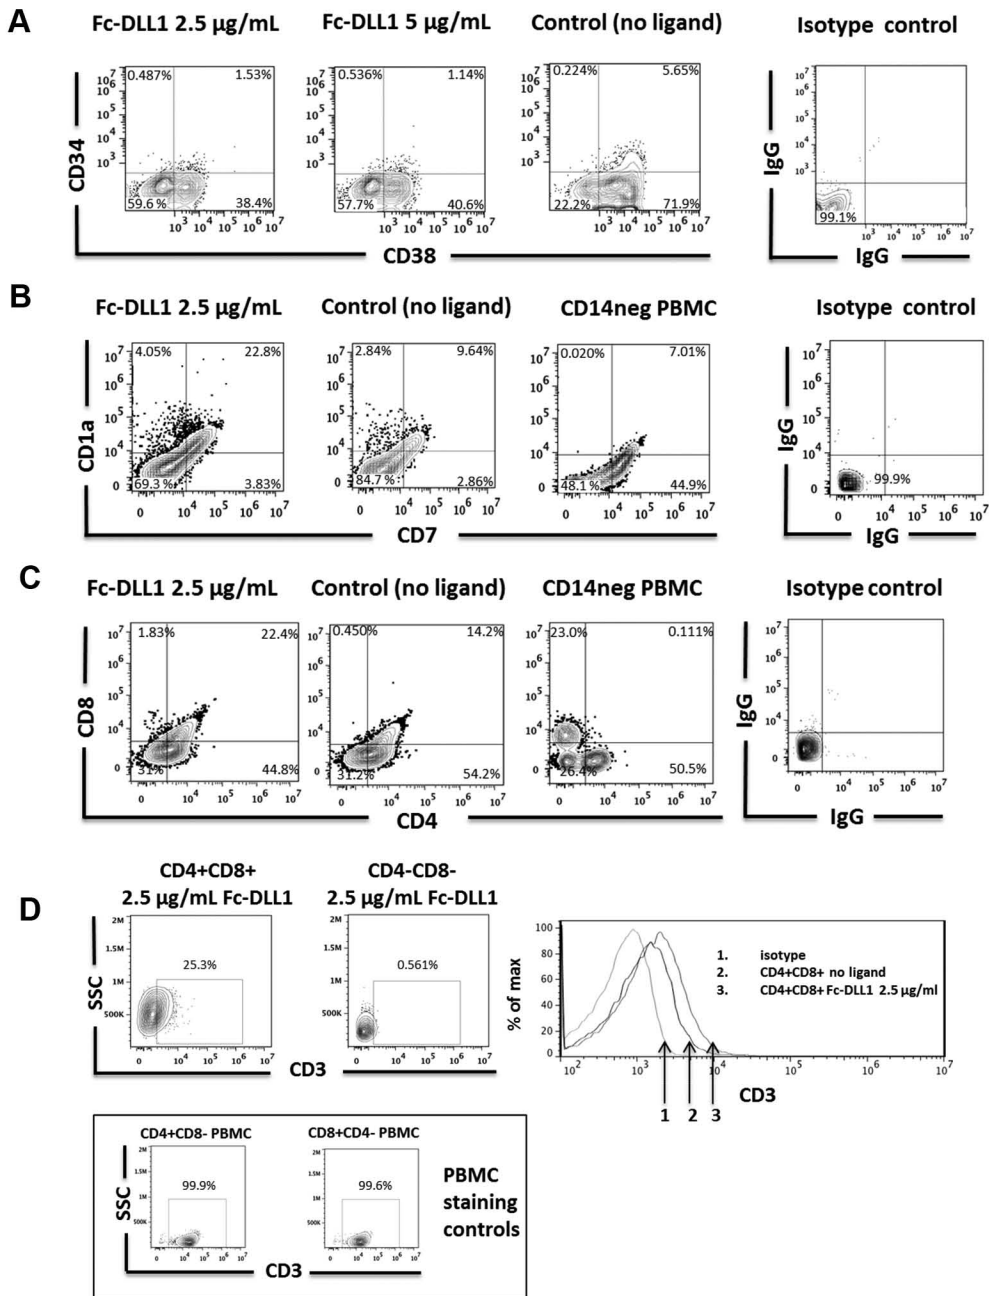

# Figure S2

Fc-DLL1 2.5  $\mu\text{g}/\text{mL}$

Fc-DLL1 5  $\mu\text{g}/\text{mL}$

Control (no ligand)

Isotype control

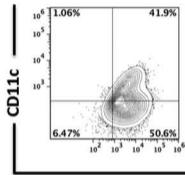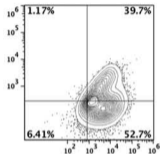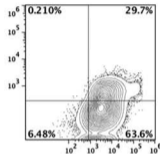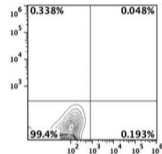

HLA-DR

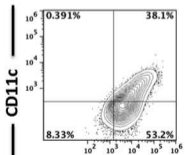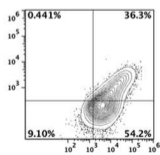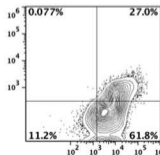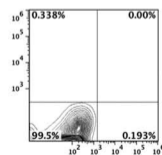

HLA-ABC

Figure S3

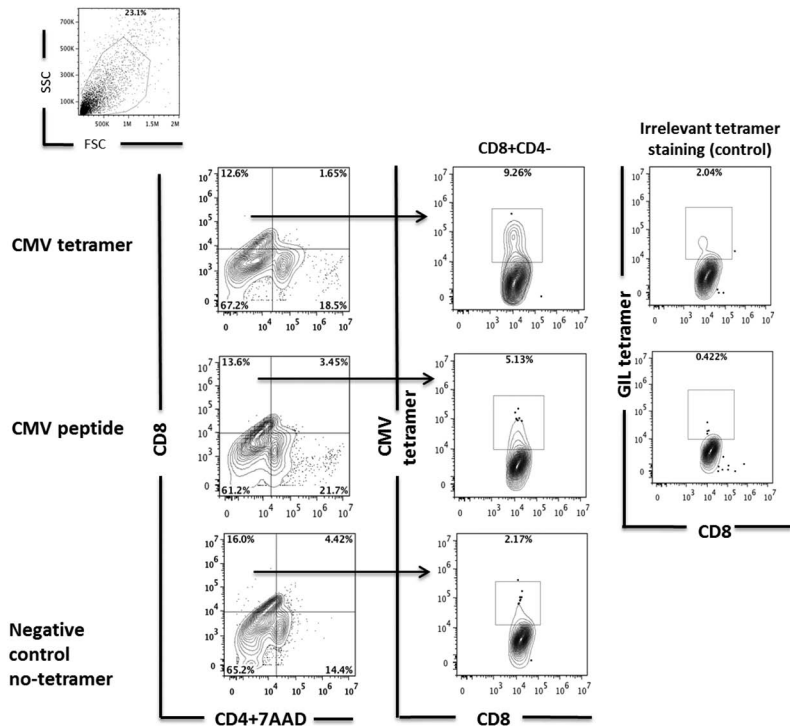

Figure S4

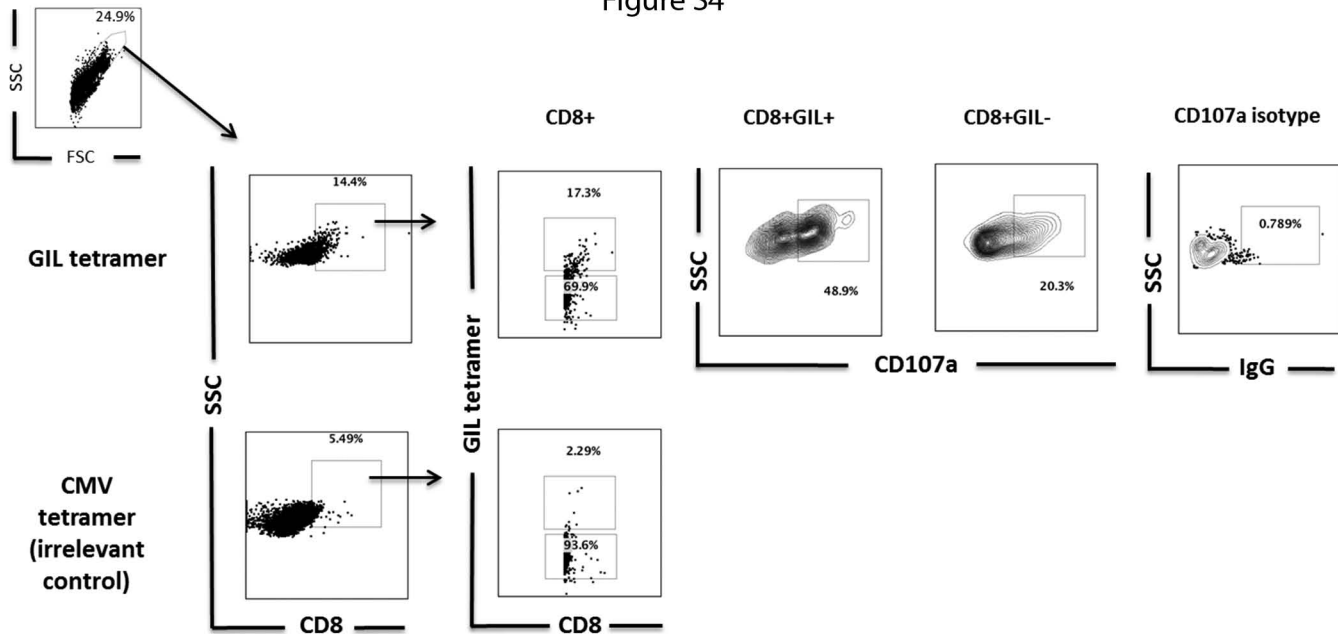

Supplement: NIHMS517502-supplement-Supp_Figure_S1-S4.pdf [file NIHMS517502-supplement-Supp_Figure_S1-S4.pdf]
